# Supplementary material for: Multilocus Data Analysis Reveal the Diversity of Cryptic Species in the Tillandsia ionantha (Bromeliaceae: Tillansiodeae) Complex
Source: MDPI journal article supplement (doi:10.3390/plants11131706), 2022-06-28
Supplement: s1 [file s1]

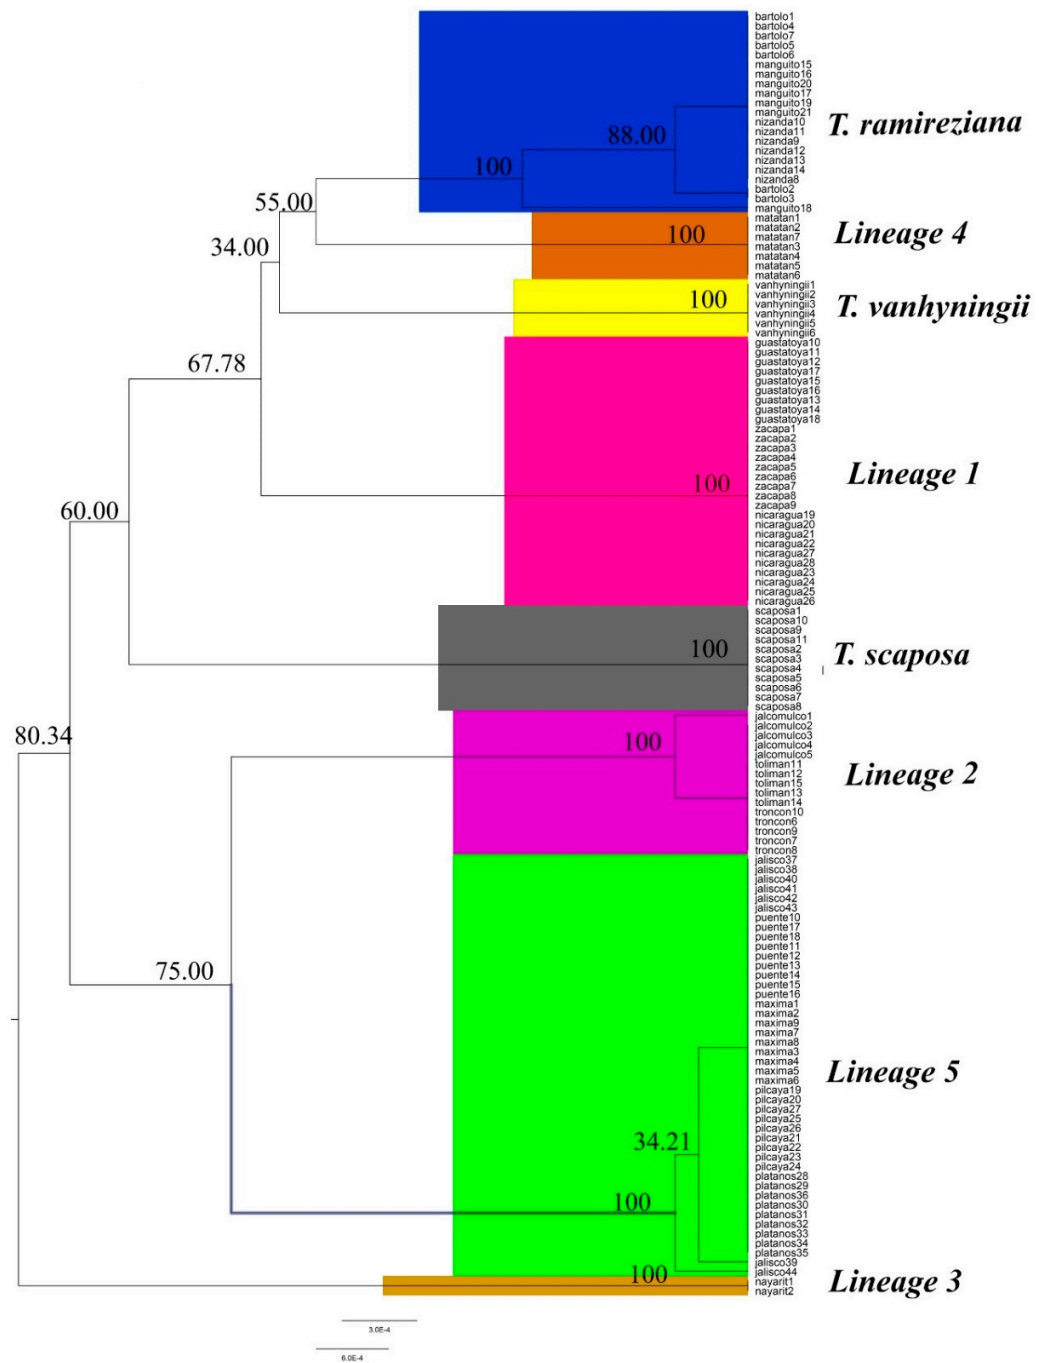

**Figure S2.** Gene tree derived from STACEY analysis for BEAST-2 using the *trnT-L-F* marker sequences. PP values  $\geq 0.90$  on the branches.

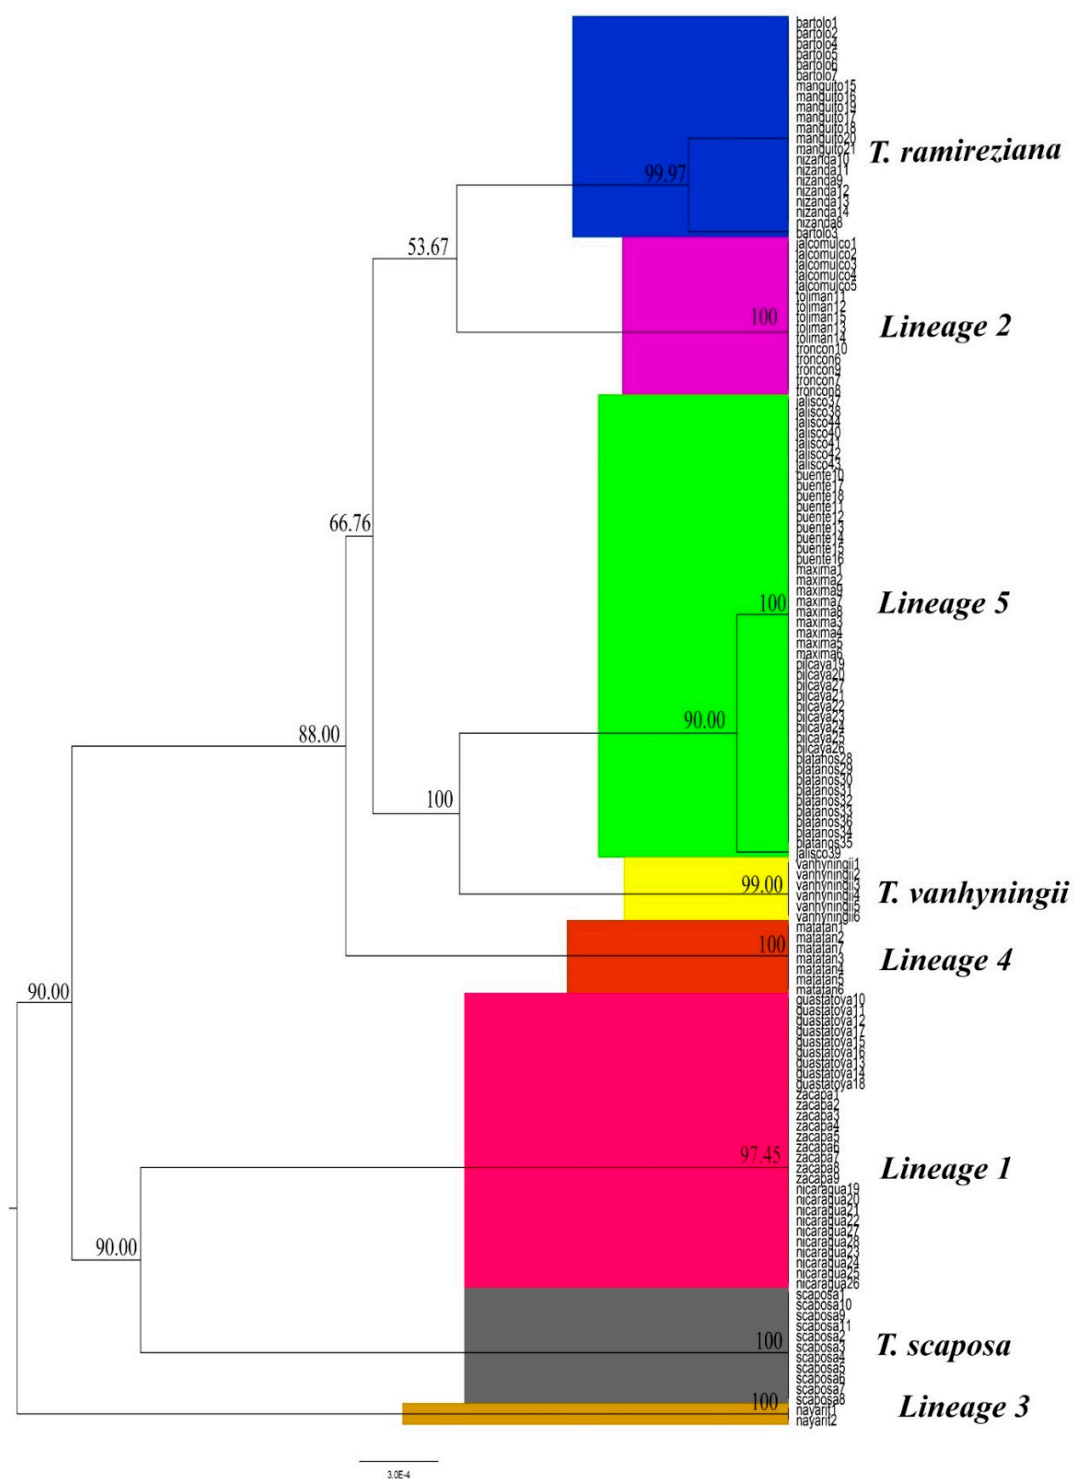

**Figure S3.** Gene tree derived from STACEY analysis for BEAST-2 using the *rps16-trnQ* marker sequences. PP values  $\geq 0.90$  on the branches.

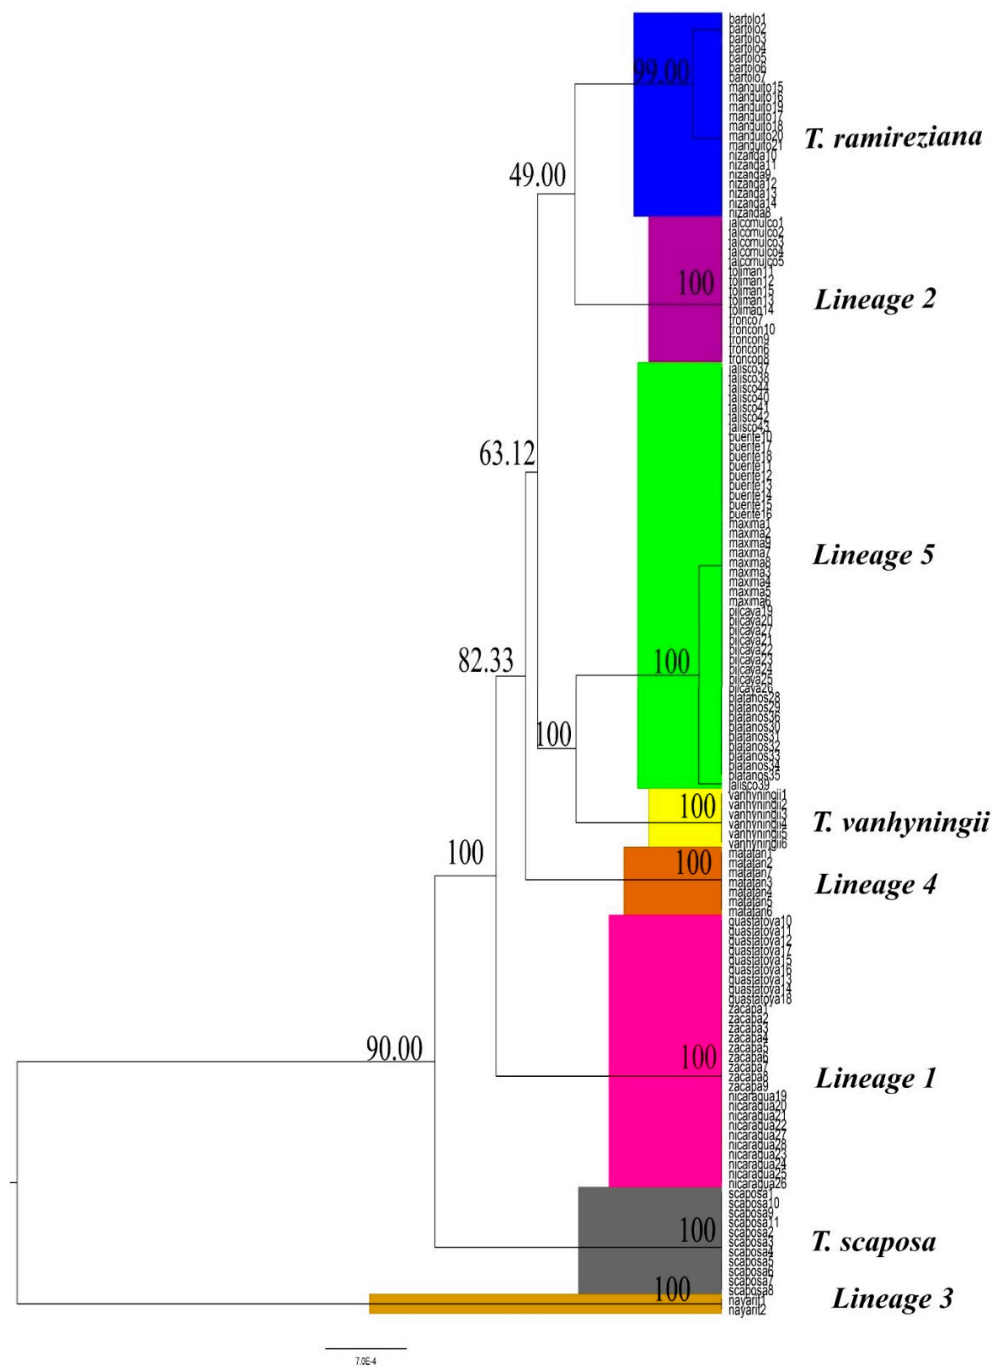

Figure S4. Gene tree derived from STACEY analysis for BEAST-2 using the *rpl16-rps3* marker sequences. PP values  $\geq 0.90$  on the branches.
